# Supplementary material for: Synthesis and solvent vapor-induced transformations of crystals of 1D coordination polymers assembled with continuous void space
Source: Royal Society of Chemistry journal article supplement (doi:10.1039/c7ce00640c), 2017-01-01
Supplement: c7ce00640c1.pdf [file c7ce00640c1.pdf]

## Supporting Information

### Synthesis and Solvent Vapor Induced Transformations of Crystals of 1D Coordination Polymer Assembled with Continuous Void Space

*Misaki Fukushima, Shoko Kikkawa, Hidemasa Hikawa, and Isao Azumaya\**

Faculty of Pharmaceutical Sciences, Toho University, 2-2-1 Miyama, Funabashi, Chiba 274-8510,  
Japan

E-mail: isao.azumaya@phar.toho-u.ac.jp

#### Table of Contents

##### 1. Experimental

###### Synthesis and Characteristic Data of Ligands and Complexes

**Figure S1.** The illustration of the experimental method of solvent exchange.

##### 2. Crystal structures of complexes

**Figure S2.** Crystal structure of **1a·Furan**

**Figure S3.** Crystal structure of **1c**

**Figure S4.** Crystal structure of **2a**

**Figure S5.** Crystal structure of **2b**

**Figure S6.** Crystal structure of **2c**

## 1. Synthesis and Characteristic Data of Ligands and Complexes

### Synthesis and Characteristic Data of Ligands

9-Chloroacridine and **L**<sub>1</sub> were synthesized according to the literatures,<sup>S1</sup> and the procedures were modified when needed in our laboratory.

#### **Synthesis of 9-chloroacridine** <sup>S2</sup>

A mixture of *N*-phenylanthranilic acid (2.3 g, 11 mmol) and POCl<sub>3</sub> (5 mL, 50 mmol) was carefully heated at 120 °C for 1.5 hr. After cooling to room temperature, the mixture was poured onto ice and neutralized to pH = 7 with 2 mol/L NaOH. The solution was transferred to 1 L Erlenmeyer flask, then added *n*-hexane (300 mL) and stirred for 12 hr until 9-chloroacridine passed into the organic phase. The yellow organic layer was separated and evaporated to give a 9-chloroacridine as a yellow powder (2.2 g, 95% yield). <sup>1</sup>H NMR (400 MHz, 298K, CDCl<sub>3</sub>), δppm): 8.47 (ddd, *J* = 8.7, 1.4, 0.7 Hz, 2H), 8.26 (d, *J* = 8.8 Hz, 2H), 7.84 (ddd, *J* = 7.7, 7.7, 1.4 Hz, 2H), 7.67 (ddd, *J* = 7.7, 7.7, 1.1 Hz, 2H).

#### **Synthesis of 9,9'-biacridine (**L**<sub>1</sub>)** <sup>S1</sup>

9-Chloroacridine (2.0 g, 9.4 mmol) was dissolved in anhydrous methanol (10 mL). The solution was added Zn powder (86 mg, 1.3 mmol) and refluxed at 80 °C for 5 hr under stirring. After cooling to room temperature the yellow solid was collected by vacuum filtration. The solid was washed with methanol, dissolved in hot chloroform, and filtered to remove the Zn powder. The crude product can be purified by recrystallization from chloroform. 9,9'-Biacridine was obtained as a yellow crystal (1.1 g, 66% yield). <sup>1</sup>H NMR (400 MHz, 298K, CDCl<sub>3</sub>), δppm): 8.42 (ddd, *J* = 8.8, 1.1, 0.8 Hz, 4H), 7.81 (ddd, *J* = 8.8, 6.5, 1.4 Hz, 4H), 7.29 (ddd, *J* = 8.8, 6.5, 1.3 Hz, 4H), 7.09 (ddd, *J* = 8.8, 1.4, 0.8 Hz, 4H).

### Synthesis and Characteristic Data of Complexes

#### **Characteristic Data for 1a·THF**

Full details of the synthesis and characteristic data are described in Experimental Section. Anal. Calcd. for C<sub>26.8</sub>H<sub>22.6</sub>AgBF<sub>4</sub>N<sub>2</sub>O<sub>2.7</sub> : [Ag(**L**<sub>1</sub>)]BF<sub>4</sub>(THF)<sub>0.2</sub>(H<sub>2</sub>O)<sub>2.5</sub>: C, 52.72; H, 3.73; N, 4.59. Found: C, 52.71; H, 3.43; N, 4.68. Fourier transform infrared spectroscopy (FT-IR) (KBr tablet,

cm<sup>-1</sup>): 3748(w), 3734(w), 3061(w), 2971(s), 2866(s), 2360(s), 2342(s), 1610(m), 1559(s), 1541(s), 1456(s), 1282(m), 1264(m), 1053(s), 890(m), 757(s), 538(m), 517(m), 420(m).

### Synthesis of **1b**·THF

**L**<sub>1</sub> (15.0 mg, 4.2×10<sup>-5</sup> mol) was dissolved in THF-methanol (5:1, v/v; 60 mL), and AgClO<sub>4</sub> (20.0 mg, 9.6×10<sup>-5</sup> mol) was dissolved in THF (10 mL). The solution of AgClO<sub>4</sub> was dropped slowly into the solution of **L**<sub>1</sub>. After 2 days, **1b**·THF was obtained in 85% yield (25.2 mg) as a yellow crystal. The PXRD data indicated that the crystalline product consists of **1b**·THF. Anal. Calcd. for C<sub>26.8</sub>H<sub>23.6</sub>AgClN<sub>2</sub>O<sub>7.2</sub>: [Ag(**L**<sub>1</sub>)]ClO<sub>4</sub>(THF)<sub>0.2</sub>(H<sub>2</sub>O)<sub>3</sub>: C, 50.92; H, 3.76; N, 4.43. Found: C, 51.16; H, 3.43; N, 4.33. FT-IR (KBr tablet, cm<sup>-1</sup>): 3051(w), 2970(w), 2865(w), 1562(m), 1517(m), 1459(m), 1090(s), 750(s), 622(s). TG analysis data indicated that the guest solvent molecules (THF) released in the range of 26–219 °C (see SI Fig. S7, Table S1).

### Synthesis of **1a**·Furan

**L**<sub>1</sub> (4.7 mg, 1.3×10<sup>-5</sup> mol) was dissolved in furan-methanol (10:3, v/v; 13 mL) and AgBF<sub>4</sub> (5.2 mg, 2.7×10<sup>-5</sup> mol) was dissolved in furan (3 mL). Then the solution of AgBF<sub>4</sub> was dropped slowly into the solution of **L**<sub>1</sub>. After 3 days, **1a**·Furan was obtained in 7.8% yield (1.4 mg) as a yellow crystal. The PXRD data supported that the whole product consists of **1a**·Furan. FT-IR (KBr tablet, cm<sup>-1</sup>): 3051(w), 1555(m), 1515(m), 1437(m), 1035(s), 750(s), 600(m), 416(m). TG analysis data indicated that the guest solvent molecules (furan) released in the range of 38–286 °C (see SI Fig. S7, Table S1).

### Synthesis of **1a**·DCM

**L**<sub>1</sub> (9.4 mg, 2.6×10<sup>-5</sup> mol) was dissolved in DCM-methanol (15:1, v/v; 16 mL) and AgBF<sub>4</sub> (17.3 mg, 8.9×10<sup>-5</sup> mol) was dissolved in THF (5 mL). The solution of AgBF<sub>4</sub> was dropped slowly into the solution of **L**<sub>1</sub>. After a day, **1a**·DCM was obtained in 75% yield (12.8 mg) as a yellow crystal. Anal. Calcd. for C<sub>26.6</sub>H<sub>18</sub>AgBCl<sub>1.2</sub>F<sub>4</sub>N<sub>2</sub>O<sub>0.4</sub>: [Ag(**L**<sub>1</sub>)]BF<sub>4</sub>(DCM)<sub>0.6</sub>(H<sub>2</sub>O)<sub>0.4</sub>: C, 52.44; H, 2.98; N, 4.60. Found: C, 52.18; H, 3.31; N, 4.64. FT-IR (KBr tablet, cm<sup>-1</sup>): 3051(w), 1541(m), 1516(s), 1457(m), 1436(m), 1265(w), 1035(s), 751(s), 599(m), 465(m), 449(m), 434(s), 412(s). TG analysis data indicated that the guest solvent molecules (DCM) released in the range of 41–266 °C (see SI Fig. S7, Table S1).

### Synthesis of 1b·DCM

**L**<sub>1</sub> (3.8 mg,  $1.1 \times 10^{-5}$  mol) was dissolved in DCM-methanol (10:4, v/v; 14 mL) and AgClO<sub>4</sub> (17.3 mg,  $8.8 \times 10^{-5}$  mol) was dissolved in THF (11 mL). Then the solution of AgBF<sub>4</sub> was dropped slowly into the solution of **L**<sub>1</sub>. After a day, **1b·DCM** was obtained in 1.5% yield (0.1 mg) as a yellow crystal. Anal. Calcd. for C<sub>26.9</sub>H<sub>19.2</sub>AgCl<sub>2.8</sub>N<sub>2</sub>O<sub>4.7</sub>: [Ag(**L**<sub>1</sub>)](ClO<sub>4</sub>)(DCM)<sub>0.9</sub>(H<sub>2</sub>O)<sub>0.7</sub>: C, 49.49; H, 2.96; N, 4.29. Found: C, 49.15; H, 3.18; N, 4.28. FT-IR (KBr tablet, cm<sup>-1</sup>): 3791(w), 3041(w), 1090(s), 749(s), 620(s), 537(w).

### Synthesis of 1c

**L**<sub>1</sub> (4.7 mg,  $1.3 \times 10^{-5}$  mol) was dissolved in DCM (50 mL), and CF<sub>3</sub>COOAg (20.5 mg,  $9.0 \times 10^{-5}$  mol) was dissolved in THF (20 mL). Then the solution of CF<sub>3</sub>COOAg was aliquoted into five glass vessels (4 mL per one vessel). To each vessel, the solution of **L**<sub>1</sub> (10 mL) was layered onto the solution of CF<sub>3</sub>COOAg. Storage of the solution mixture at 20 °C for 2 weeks give yellow crystals in 36% yield (3.8 mg). Anal. Calcd. for C<sub>30</sub>H<sub>18</sub>Ag<sub>2</sub>F<sub>6</sub>N<sub>2</sub>O<sub>5</sub>: [Ag<sub>2</sub>(**L**<sub>1</sub>)](CF<sub>3</sub>COO)<sub>2</sub>·H<sub>2</sub>O: C, 44.15; H, 2.22; N, 3.43. Found: C, 43.81; H, 2.35; N, 3.29. FT-IR (KBr tablet, cm<sup>-1</sup>): 3433(s), 1682(s), 1645(m), 1210(s), 750(s), 600(m), 419(m).

### Synthesis of 2a

**L**<sub>2</sub> (57.7 mg,  $3.2 \times 10^{-4}$  mol) was dissolved in THF (10 mL), and AgBF<sub>4</sub> (270.9 mg,  $1.4 \times 10^{-3}$  mol) was dissolved in THF (10 mL). Then the solution of AgBF<sub>4</sub> was aliquoted into a glass vessel. To the vessel, methanol (5 mL) and the solution of **L**<sub>2</sub> were layered sequentially onto the solution of AgBF<sub>4</sub>. Storage of the solution mixture at 20 °C for 1 day, give yellow crystals in 48% yield (58.1 mg). Anal. Calcd. for C<sub>12</sub>H<sub>8</sub>AgBF<sub>4</sub>N<sub>2</sub>: [Ag(**L**<sub>2</sub>)]BF<sub>4</sub>: C, 38.45; H, 2.15; N, 7.47. Found: C, 38.43; H, 2.53; N, 7.46. FT-IR (KBr tablet, cm<sup>-1</sup>): 3060(w), 1524(s), 1474(s), 1436(s), 1353(s), 1033(s), 835(s), 753(s), 665(s), 599(s), 521(s), 408(m).

### Synthesis of 2b<sup>S3</sup>

**L**<sub>2</sub> (78.7 mg,  $4.4 \times 10^{-4}$  mol) was dissolved in THF (10 ml), and AgClO<sub>4</sub> (404.6 mg,  $2.0 \times 10^{-3}$  mol) was dissolved in THF (10 mL). Then the solution of AgClO<sub>4</sub> was aliquoted into a glass vessel. To the vessel, methanol (5 mL) and the solution of **L**<sub>2</sub> were layered sequentially onto the solution of AgClO<sub>4</sub>. Storage of the solution mixture at 20 °C for 1 day, give yellow crystals in 80% yield (136.3 mg). Anal. Calcd. for C<sub>12</sub>H<sub>8</sub>AgClN<sub>2</sub>O<sub>4</sub>: [Ag(**L**<sub>2</sub>)]ClO<sub>4</sub>: C, 37.19; H, 2.08; N, 7.23. Found: C,

37.11; H, 2.23; N, 7.24. FT-IR (KBr tablet,  $\text{cm}^{-1}$ ): 3440(s), 1726(w), 1665(w), 1563(m), 1074(s), 748(s), 620(s), 596(m), 415(s), 402(s).

### Synthesis of 2c

A solution of  $\text{CF}_3\text{COOAg}$  (167.7 mg,  $7.6 \times 10^{-4}$  mol) in THF (10 mL) was placed into a glass vessel. To the vessel, methanol (5 mL) and the solution of  $\text{L}_2$  (41.8 mg,  $2.3 \times 10^{-4}$  mol) in DCM (10 mL) were layered sequentially onto the solution of  $\text{L}_2$ . Storage of the solution mixture at 20 °C for 1 day, give yellow crystals in 85% yield. Anal. Calcd. for  $\text{C}_{16}\text{H}_8\text{Ag}_2\text{F}_6\text{N}_2\text{O}_4$ :  $[\text{Ag}(\text{L}_2)](\text{CF}_3\text{COO})_2$ : C, 30.90; H, 1.30; N, 4.50. Found: C, 30.84; H, 1.46; N, 4.53. FT-IR (KBr tablet,  $\text{cm}^{-1}$ ): 3670(w), 3440(b), 1681(s), 1515(m), 1434(m), 1210(s), 1132(s), 838(m), 804(m), 748(m), 724(m), 594(w).

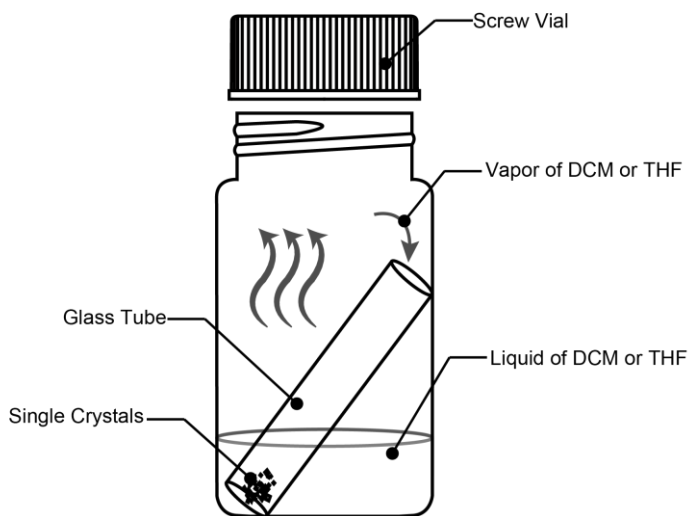

**Figure S1.** The illustration of the experimental method of solvent exchange.

## 2. Crystal structures of complexes

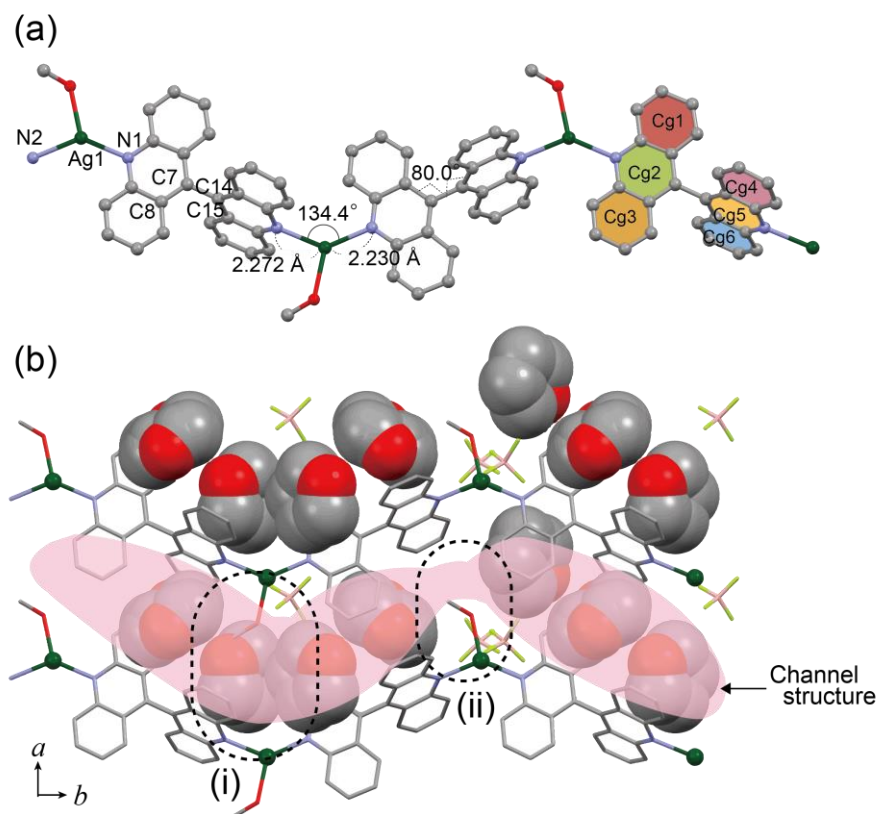

**Figure S2.** Crystal structure of **1a·Furan**: (a) 1D structure consisting of **L1**, Ag(I) ions and methanol, (b) viewing along the *c*-axis. The 1D structure featured channels were zigzag-shaped and filled with furan. The maximum cross section is 6.6×6.2 Å<sup>2</sup> (see (i)), and its minimum was 3.8×0.1 Å<sup>2</sup> (see (ii)). Colors: C, gray spheres; Ag, green spheres; B, pink spheres; Cl, light green spheres; F, yellow spheres; N, violet spheres; O, red spheres. H atoms have been omitted for clarity.

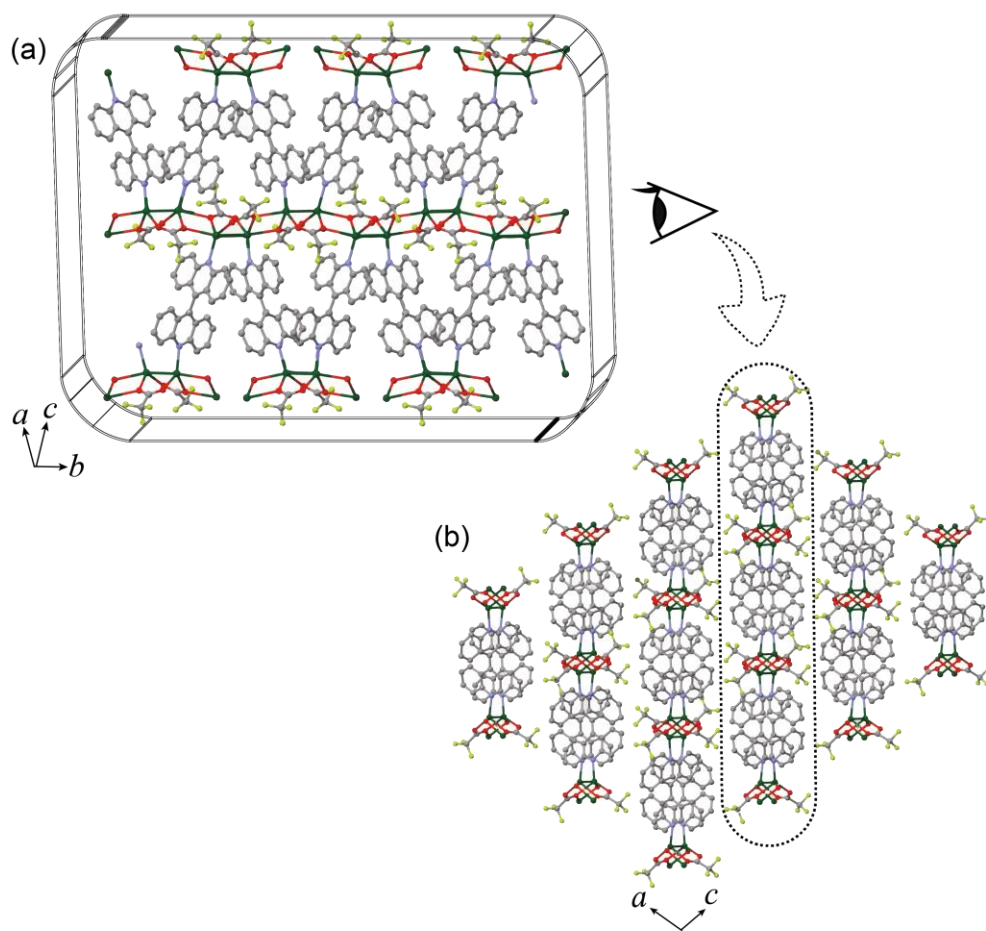

**Figure S3.** Crystal structure of **1c**: (a) 2D layer, (b) viewing along the *b*-axis. Colors: C, gray spheres; Ag, green spheres; B, pink spheres; F, yellow spheres; N, violet spheres; O, red spheres. H atoms have been omitted for clarity.

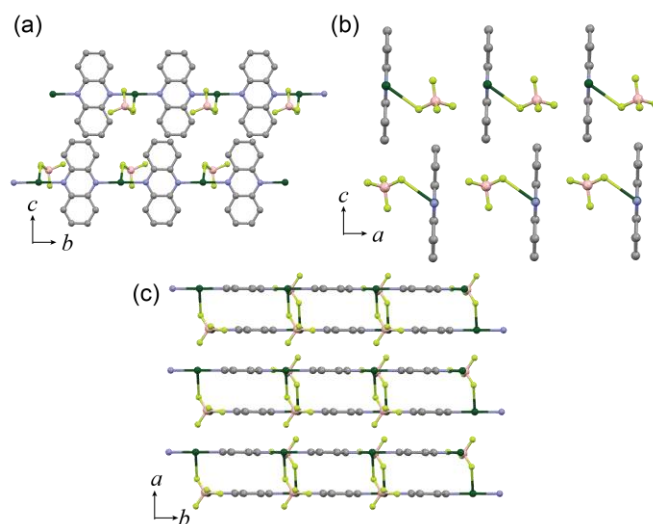

**Figure S4.** Crystal structure of **2a** is viewed along the *a*-axis (a), *b*-axis (b), *c*-axis (c). Colors: C, gray spheres; Ag, green spheres; B, pink spheres; F, yellow spheres; N, violet spheres. H atoms have been omitted for clarity.

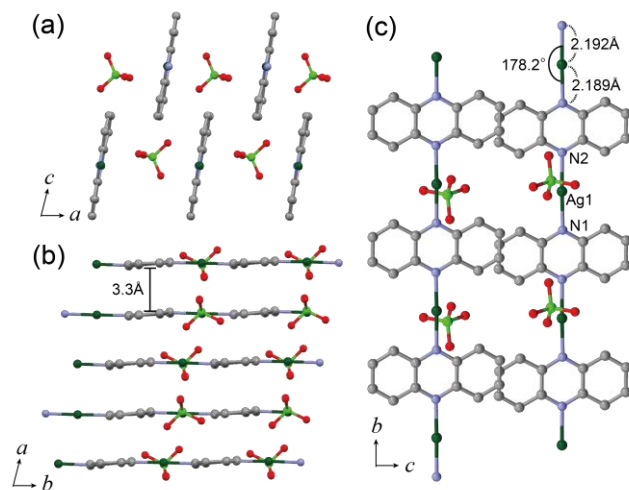

**Figure S5.** Crystal structure of **2b** is viewed along the (a) *b*-axis, (b) *c*-axis and (c) *a*-axis. Colors: C, gray spheres; Ag, green spheres; B, pink spheres; F, yellow spheres; N, violet spheres. H atoms have been omitted for clarity.



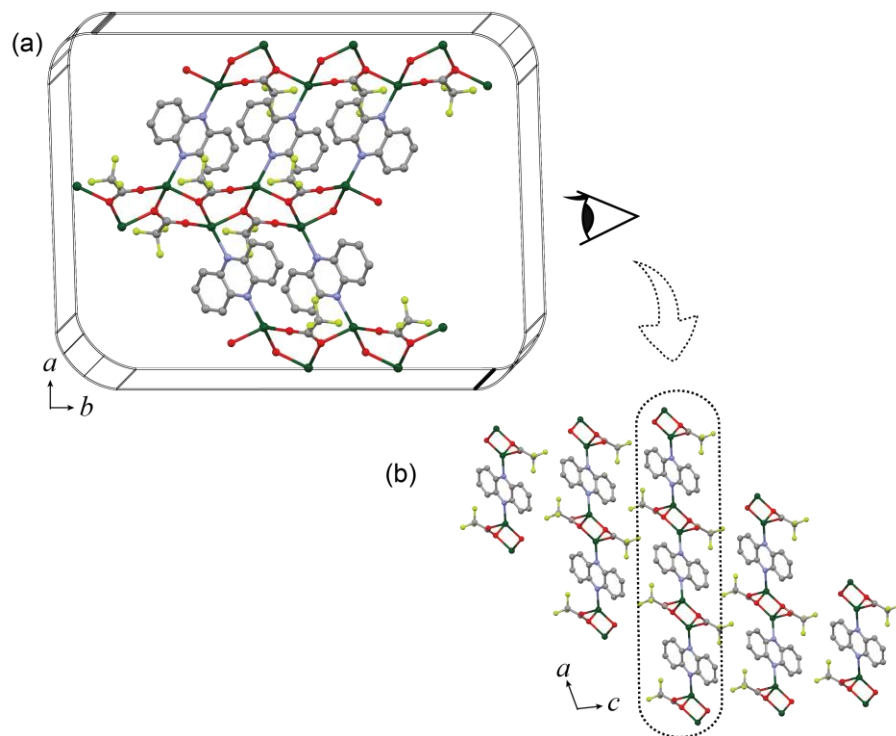

**Figure S6.** Crystal structure of **2c**: (a) 2D layer, (b) viewing along the *b*-axis. Colors: C, gray spheres; Ag, green spheres; B, pink spheres; F, yellow spheres; N, violet spheres; O, red spheres. H atoms have been omitted for clarity.

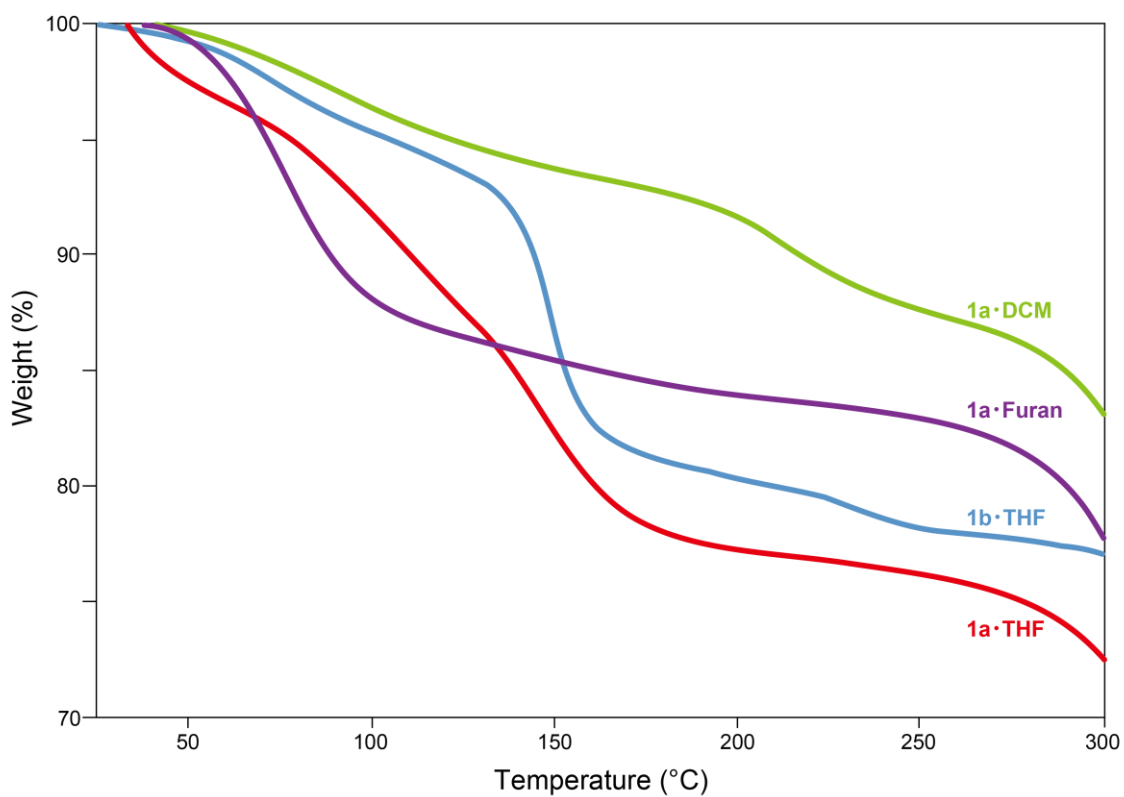

**Figure S7.** TG curves of **1a·THF**, **1b·THF**, **1a·Furan** and **1a·DCM**.

**TableS1.** TG data.

| Sample          | Estimated formula                                                                         | Weight loss (%) (calcd) |        |
|-----------------|-------------------------------------------------------------------------------------------|-------------------------|--------|
| <b>1a·THF</b>   | $[\text{Ag}(\text{L}_1)]_n(\text{BF}_4)_n \cdot 2n\text{THF}$                             | 20.2                    | (20.7) |
| <b>1b·THF</b>   | $[\text{Ag}(\text{L}_1)]_n(\text{ClO}_4)_n \cdot 2n\text{THF}$                            | 20.1                    | (20.4) |
| <b>1a·Furan</b> | $[\text{Ag}(\text{L}_1)(\text{CH}_3\text{OH})]_n(\text{BF}_4)_n \cdot 1.5n(\text{furan})$ | 18.4                    | (19.6) |
| <b>1a·DCM</b>   | $[\text{Ag}(\text{L}_1)]_n(\text{BF}_4)_n \cdot n\text{DCM}$                              | 13.1                    | (13.4) |

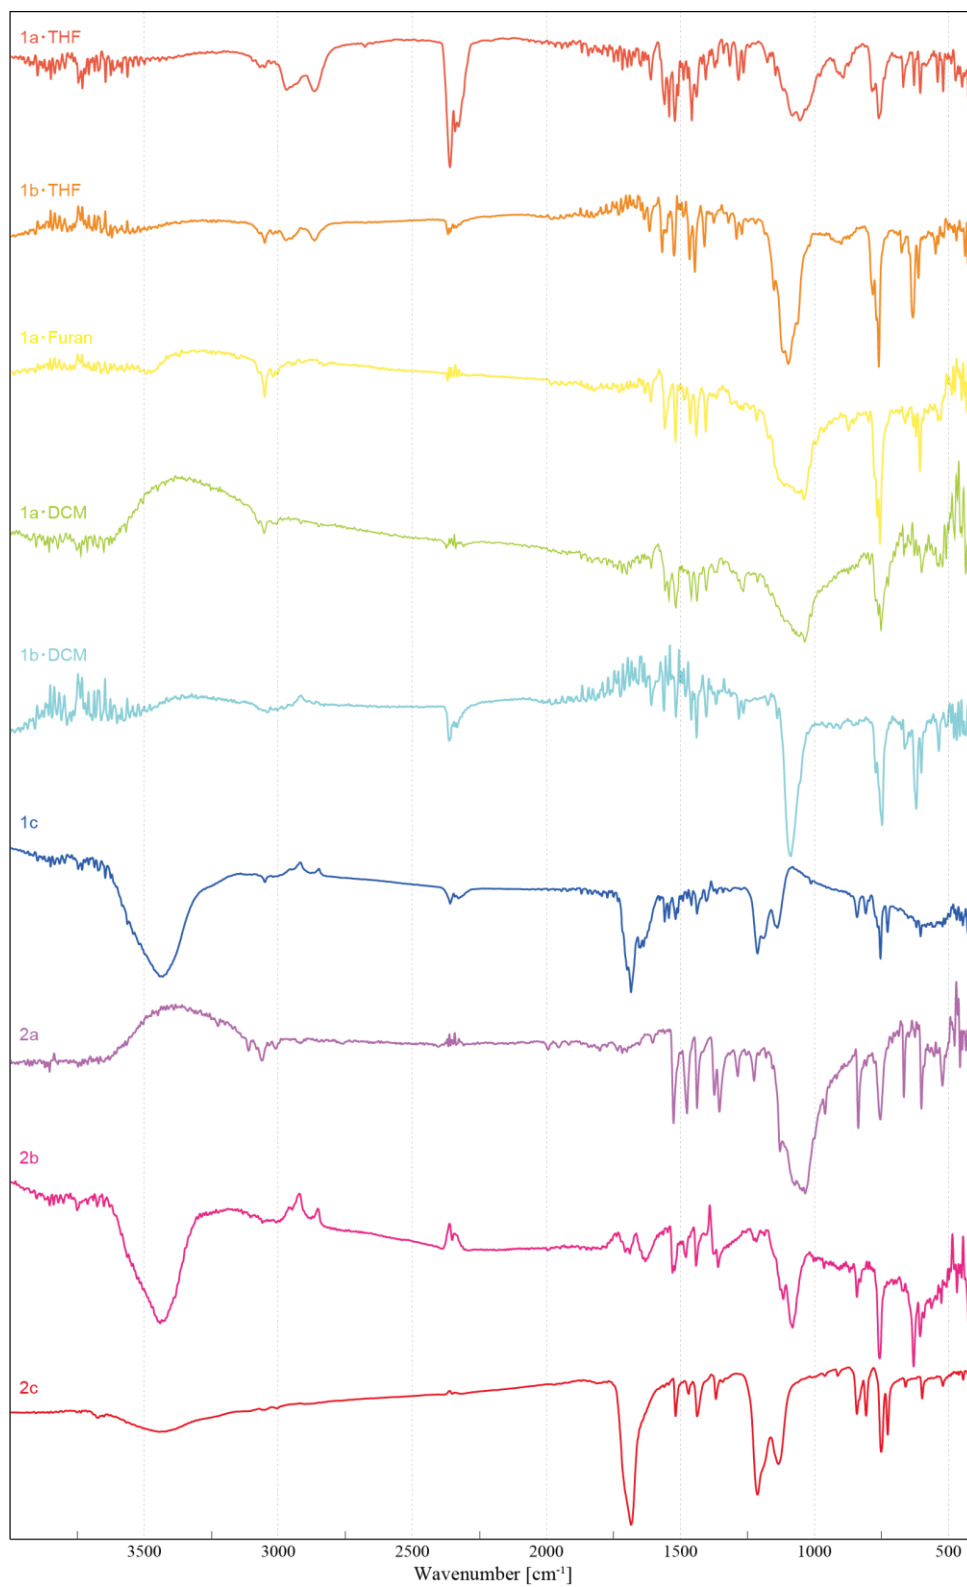

**Figure S8.** IR spectra of the complexes.

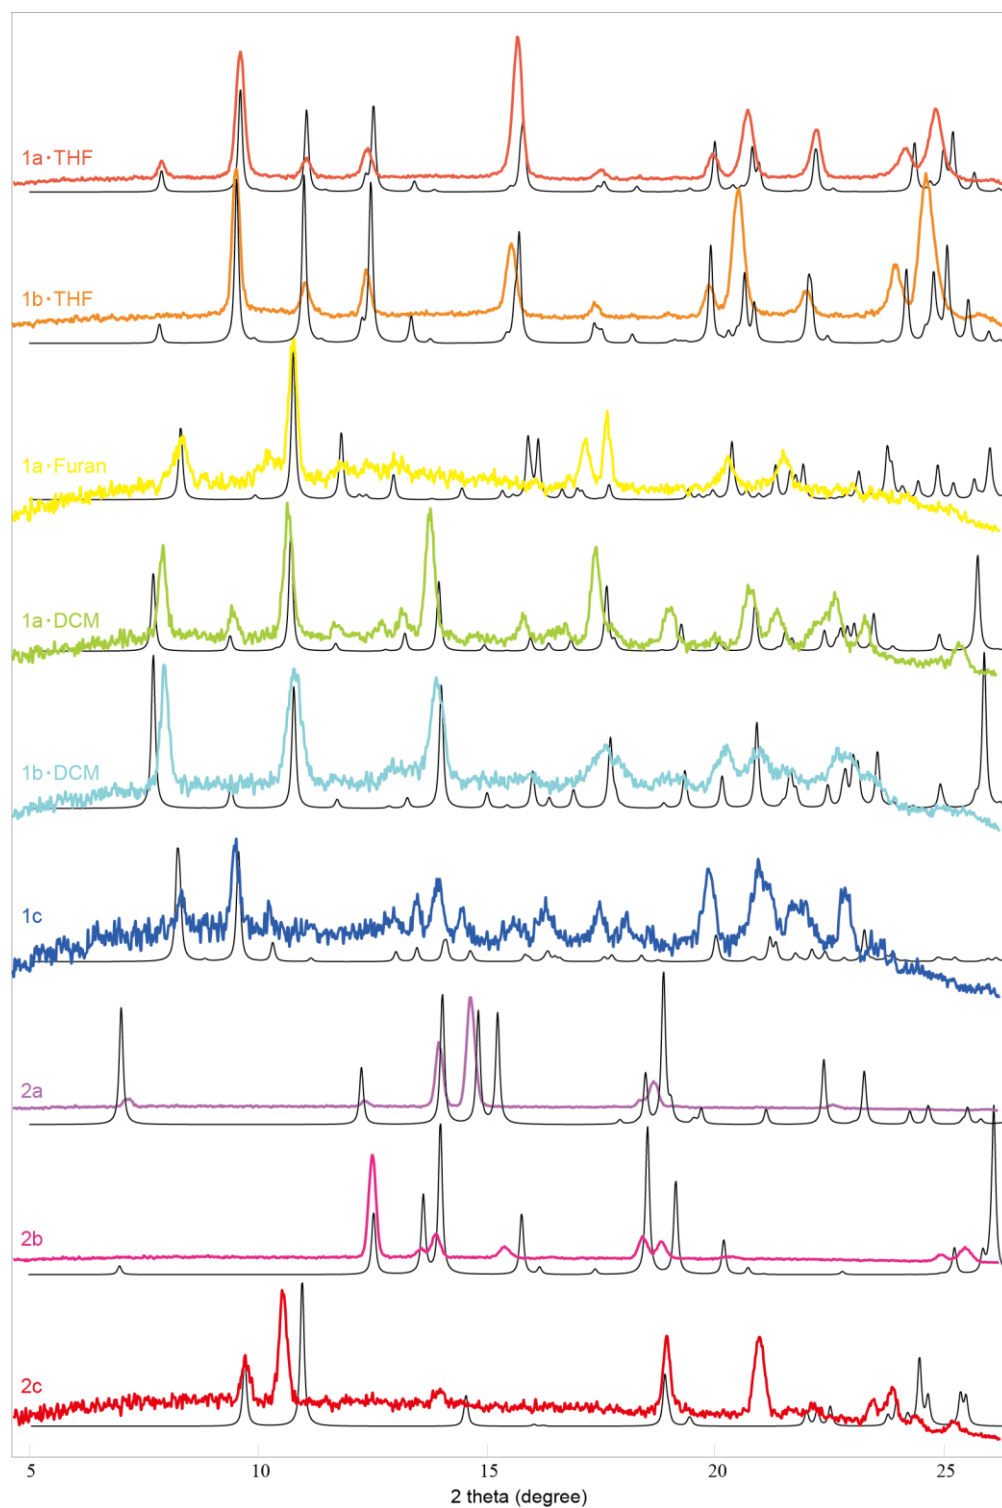

**Figure S9.** PXRD patterns of all complexes. Colored lines: experimental data, black lines: simulation data.

## REFERENCES

- (S1) (a) A. A. Taherpour, D. Kvaskoff, P. V. Bernhardt, C. Wentrup, *J. Phys. Org. Chem.*, 2010, **23**, 382 (b) G. Boyer, T. Lormier, J. P. Galy, A. L. Llamas-Saiz, C. Foces-Foces, M. Fierros, J. Elguero, A. Virgili, *Molecules*, 1999, **4**, 104.
- (S2) X. Lang, L. Li, Y. Chen, Q. Sun, Q. Wu, F. Liu, C. Tan, H. Liu, C. Gao, Y. Jiang, *Bioorg. Med. Chem.*, 2013, **21**, 4170.
- (S3) M. Munakata, S. Kitagawa, N. Ujimar, M. Nakamura, M. Maekawa, H. Matsuda, *Inorg. Chem.*, 1993, **32**, 826.
